# Supplementary material for: Contextualizing Parental/Familial Influence on Physical Activity in Adolescents before and during COVID-19 Pandemic: A Prospective Analysis
Source: Children (Basel). 2020 Sep 3;7(9):125. doi: 10.3390/children7090125 (PMC7552694; doi:10.3390/children7090125)
Supplement: Supplementary file 1 [file children-07-00125-s001.pdf]

Supplementary table S1

Frequencies (F) and percentages (%) in studied sociodemographic-, parental- and familial factors with differences between boys and girls (MW – Mann Whitney test)

|                                           | Boys |      | Girls |      | MW   |       |
|-------------------------------------------|------|------|-------|------|------|-------|
|                                           | F    | %    | F     | %    | MW   | p     |
| <b>Socioeconomic status of the family</b> |      |      |       |      | 0.39 | 0.69  |
| Below average                             | 12   | 3.3  | 2     | 0.6  |      |       |
| Average                                   | 328  | 89.6 | 308   | 95.7 |      |       |
| Above average                             | 26   | 7.1  | 12    | 3.7  |      |       |
| <b>Paternal education</b>                 |      |      |       |      | 3.37 | 0.001 |
| Elementary school                         | 16   | 4.4  | 36    | 11.2 |      |       |
| High school                               | 257  | 70.2 | 226   | 70.2 |      |       |
| College                                   | 47   | 12.8 | 36    | 11.2 |      |       |
| University level                          | 46   | 12.6 | 24    | 7.5  |      |       |
| <b>Maternal education</b>                 |      |      |       |      | 3.33 | 0.01  |
| Elementary school                         | 84   | 23.0 | 120   | 37.3 |      |       |
| High school                               | 238  | 65.0 | 160   | 49.7 |      |       |
| College                                   | 24   | 6.6  | 20    | 6.2  |      |       |
| University level                          | 20   | 5.5  | 22    | 6.8  |      |       |
| <b>Parental conflict</b>                  |      |      |       |      | 5.45 | 0.001 |
| Never                                     | 174  | 47.5 | 92    | 28.6 |      |       |
| Rarely                                    | 134  | 36.6 | 142   | 44.1 |      |       |
| From time to time                         | 54   | 14.8 | 72    | 22.4 |      |       |
| Often/regularly                           | 4    | 1.1  | 16    | 5.0  |      |       |
| <b>Parental absence from home</b>         |      |      |       |      | 0.83 | 0.40  |
| Never                                     | 55   | 15.0 | 80    | 24.8 |      |       |
| Rarely                                    | 107  | 29.2 | 70    | 21.7 |      |       |
| From time to time                         | 138  | 37.7 | 106   | 32.9 |      |       |
| Often/regularly                           | 64   | 17.5 | 66    | 20.5 |      |       |
| <b>Parental questioning</b>               |      |      |       |      | 2.37 | 0.02  |
| Never                                     | 12   | 3.3  | 8     | 2.5  |      |       |
| Rarely                                    | 54   | 14.8 | 32    | 9.9  |      |       |
| From time to time                         | 160  | 43.7 | 96    | 29.8 |      |       |
| Often/regularly                           | 140  | 38.3 | 184   | 57.1 |      |       |
| <b>Parental care</b>                      |      |      |       |      | 4.54 | 0.001 |
| Very poor                                 | 6    | 1.6  | 0     | 0.0  |      |       |
| Low                                       | 10   | 2.7  | 10    | 3.1  |      |       |

|                             |     |      |     |      |
|-----------------------------|-----|------|-----|------|
| Parents care about me       | 141 | 38.5 | 100 | 31.1 |
| Parents care about me a lot | 209 | 57.1 | 212 | 65.8 |
